# Supplementary material for: Does back pain prevalence really decrease with increasing age? A systematic review
Source: Oxford University Press journal article supplement (doi:10.1093/ageing/afj055), 2006-03-17
Supplement: afj055_Supplementary_Data.zip [file afj055_Supplementary_Data.zip]

Supplementary Table. Summary of “good quality” prevalence studies retained for complete review

| Study #<br>Type of<br>outcome<br>[ref.] | Authors,<br>year          | Country, Place<br>Study                                                                                         | Study<br>design                                          | Sampling frame                                                                                                                                | Final<br>sample size<br>/ response<br>rate                         | Definiti<br>on of<br>age                         | Definition of back pain                                                                                                                                                                                                                                                                                                                                                     | Study results                                                                                                                                                                                                                                                                                                                                           | Trend                                                                                                                                                                                                                                                                                                       | Quality<br>score |
|-----------------------------------------|---------------------------|-----------------------------------------------------------------------------------------------------------------|----------------------------------------------------------|-----------------------------------------------------------------------------------------------------------------------------------------------|--------------------------------------------------------------------|--------------------------------------------------|-----------------------------------------------------------------------------------------------------------------------------------------------------------------------------------------------------------------------------------------------------------------------------------------------------------------------------------------------------------------------------|---------------------------------------------------------------------------------------------------------------------------------------------------------------------------------------------------------------------------------------------------------------------------------------------------------------------------------------------------------|-------------------------------------------------------------------------------------------------------------------------------------------------------------------------------------------------------------------------------------------------------------------------------------------------------------|------------------|
| 1<br>B<br><br>[32]                      | Thomas<br>et al,<br>2004* | United<br>Kingdom, North<br>Staffordshire<br>(North<br>Staffordshire<br>Osteoarthritis<br>Project -<br>NorStOP) | Cross-<br>sectional<br>postal<br>survey                  | Adults aged ≥ 50 years<br>registered with three<br>primary care general<br>practices                                                          | 7,878 /<br>71.3%                                                   | 50-59<br>60-69<br>70-79<br>80+                   | “In the past 4 weeks, have you had pain that has<br>lasted for one day or longer in any part of your<br>body”. Those responding positively were asked<br>to shade their painful areas on a full body<br>manikin. The low back area was recorded by<br>using a standard transparent template marked<br>with its border. Also back pain interfering with<br>daily activities. | Consistent decline in prevalence of low back and neck<br>pain with increasing age.<br>Among back pain sufferers, the proportion of low back<br>pain interfering with daily activities increased with<br>increasing age; however, the prevalence of back pain<br>interfering with daily activities among all subjects was<br>stable.                     | <br>                                                                                                                                  | 75               |
| 3<br>C<br>F<br><br>[36]                 | Walker<br>et al,<br>2004  | Australia                                                                                                       | Cross-<br>sectional<br>postal<br>survey                  | Residents of Australia<br>aged ≥ 18 years.<br>Stratified sample for age,<br>gender and state using<br>1996 Australian Census<br>weighted data | 1,913 /<br>69.1%                                                   | 18-29<br>30-39<br>40-49<br>50-59<br>60-69<br>70+ | Diagram of a mannequin that defined the low<br>back area. “Have you had low back pain in the<br>past 6 months”. CPG. <sup>1</sup>                                                                                                                                                                                                                                           | The prevalence of CPG I (low intensity pain, low<br>disability) decreased with increasing age, and grade II<br>(high intensity pain, low disability) remained relatively<br>constant, while grades III (high disability, moderately<br>limiting) and IV (high disability, severely limiting)<br>increased to the fifth decade and then remained stable. | <br>                                                                                                                                  | 100              |
| 7<br>C<br>F<br><br>[35]                 | George,<br>2002*          | Canada,<br>Saskatchewan<br>(Saskatchewan<br>Health and Low<br>Back Pain<br>Study)                               | Six-month<br>longitudinal<br>prospective<br>postal study | Age-stratified probability<br>sample of 2,184 non-<br>institutionalised<br>Saskatchewan residents<br>aged 20-69 years                         | 1,110 /<br>55.1% at<br>baseline and<br>628 / 74.1%<br>at follow-up | Not<br>stated                                    | Six-month cumulative incidence of clinically<br>significant low back pain. Diagram of a<br>mannequin defined the low back area. CPG was<br>used to identify clinically significant low back<br>pain (grades II, III and IV).                                                                                                                                                | Age was not associated with the 6-month cumulative<br>incidence of clinically significant low back pain.                                                                                                                                                                                                                                                |                                                                                                                                                                                                                        | 83               |
| 8<br>A<br>C<br>E<br>F<br><br>[33]       | Cassidy<br>et al,<br>1998 | Canada,<br>Saskatchewan<br>(Saskatchewan<br>Health and Low<br>Back Pain<br>Study)                               | Cross-<br>sectional<br>postal<br>survey                  | Age-stratified probability<br>sample of 2,184 non-<br>institutionalised<br>Saskatchewan residents<br>aged 20-69 years                         | 1,131 /<br>55.1%                                                   | 20-29<br>30-39<br>40-49<br>50-59<br>60-69        | Mannequin diagram to define the anatomic<br>location of low back pain and a direct question:<br>“Do you have low back pain at the present time,<br>that is, right now?” (point prevalence) / “In your<br>lifetime, have you ever had low back pain?”<br>(lifetime prevalence) / CPG - 6-month period<br>prevalence.                                                         | Little variation in estimates over age groups for point and<br>lifetime prevalence. Prevalence of grade I low back pain<br>decreased with increasing age. That of grade II low back<br>pain remained constant with increasing age. The<br>prevalence of disabling low back pain (grades III and IV)<br>increased with increasing age.                   | CPG I:<br><br>CPG II:<br><br>CPG III+IV:<br> | 92               |

<sup>1</sup>Chronic Pain Grade (63. Von Korff M, Ormel J, Keefe FJ, Dworkin SF. Grading the severity of chronic pain. Pain 1992;50(2):133-49.

| Study #<br>Type of<br>outcome<br>[ref.] | Authors,<br>year                     | Country, Place<br>Study                                                                                                      | Study<br>design                            | Sampling frame                                                                                                                                                              | Final<br>sample size<br>/ response<br>rate | Definiti<br>on of<br>age                          | Definition of back pain                                                                                                                                                                                                                                                   | Study results                                                                                                                                                                                                                                                                          | Trend                                                                                                                                                                                                         | Quality<br>score |
|-----------------------------------------|--------------------------------------|------------------------------------------------------------------------------------------------------------------------------|--------------------------------------------|-----------------------------------------------------------------------------------------------------------------------------------------------------------------------------|--------------------------------------------|---------------------------------------------------|---------------------------------------------------------------------------------------------------------------------------------------------------------------------------------------------------------------------------------------------------------------------------|----------------------------------------------------------------------------------------------------------------------------------------------------------------------------------------------------------------------------------------------------------------------------------------|---------------------------------------------------------------------------------------------------------------------------------------------------------------------------------------------------------------|------------------|
| 9<br><br>A<br>C<br>E<br>F<br><br>[34]   | Côté et<br>al, 1998                  | Canada,<br>Saskatchewan<br>(Saskatchewan<br>Health and Low<br>Back Pain<br>Study)                                            | Cross-<br>sectional<br>postal<br>survey    | Age-stratified probability<br>sample of 2,184 non-<br>institutionalised<br>Saskatchewan residents<br>aged 20-69 years                                                       | 1,131 /<br>55.1%                           | 20-29<br>30-39<br>40-49<br>50-59<br>60-69         | Neck pain: mannequin diagram and a direct<br>question: “Do you have neck pain at the present<br>time, that is right now?” (point prevalence) / “In<br>your lifetime, have you ever experienced neck<br>pain?” (lifetime prevalence) / CPG - 6-month<br>period prevalence. | The prevalence of grade I neck pain decreased steadily<br>with increasing age. That of grades II and III-IV<br>(combined) did not vary significantly across the age<br>groups.                                                                                                         | CPG I:<br><br><br>CPG<br>II+III+IV:<br> | 92               |
| 10<br><br>C<br>F<br><br>[38]            | Goubert<br>et al,<br>2004            | Belgium                                                                                                                      | Cross-<br>sectional<br>postal<br>survey    | 2,485 members of an<br>access panel composing a<br>representative sample of<br>the Belgian population<br>aged $\geq 17$ years                                               | 1,624 /<br>65.4%                           | 17-25<br>26-35<br>36-45<br>46-55<br>56-65<br>> 65 | Low back pain for one day or longer in the past<br>6 months (6-month period prevalence). CPG<br>was used to classify participants into one of five<br>categories (grades 0 to IV).                                                                                        | No statistically significant differences between age groups<br>for overall 6-month period prevalence. When classified<br>with the CPG, however, the prevalence of grades I and II<br>low back pain tended to decrease with age, while that of<br>grades III and IV tended to increase. | CPG I+II:<br><br><br>CPG III+IV:<br>   | 83               |
| 11<br><br>A<br>D<br>F<br><br>[51, 52]   | Picavet<br>and<br>Schouten<br>, 2003 | The Netherlands<br>(Dutch<br>Musculoskeletal<br>Complaints and<br>Consequences<br>Cohort study -<br>DMC <sub>3</sub> -study) | Cross-<br>sectional<br>postal<br>survey    | Random sample of 7,818<br>persons aged $\geq 25$ years,<br>stratified by age and<br>gender, taken from the<br>1998 population register                                      | 3,664 /<br>46.9%                           | 25-44<br>45-64<br>65+                             | “Did you have pain in the (a-neck, shoulders or<br>higher part of the back or b-lower part of the<br>back) during the past 12 months?” Also point<br>prevalence and prevalence of “chronic” pain (><br>3 months).                                                         | For neck, shoulders and higher back, no change of 12-<br>month prevalence with increasing age. For low back, there<br>was a small decline with increasing age (not significant).                                                                                                       |                                                                                                                          | 75               |
| 12<br><br>C<br><br>[45, 46]             | Bassols<br>et al,<br>1999            | Spain, Catalonia                                                                                                             | Cross-<br>sectional<br>telephone<br>survey | Random sample of 2,142<br>non-institutionalised<br>adults ( $\geq 18$ years),<br>stratified by age, sex and<br>residential area, taken<br>from the 1991 electoral<br>census | 1,964 /<br>91.7%                           | 20-30<br>31-50<br>51-70<br>71-90                  | Any pain complaint in the last 6 months in back<br>or neck, regardless of intensity and duration.                                                                                                                                                                         | The prevalence for back and neck pain amongst all age<br>groups was similar.                                                                                                                                                                                                           |                                                                                                                          | 75               |
| 14<br><br>A<br>F<br><br>[31]            | Elliott et<br>al, 1999               | United<br>Kingdom,<br>Grampian<br>region of<br>Northeast<br>Scotland                                                         | Cross-<br>sectional<br>postal<br>survey    | Random sample,<br>stratified for age and sex,<br>of 5,036 patients aged $\geq$<br>25 years, drawn from 29<br>general practices in UK                                        | 3,605 /<br>82.3%                           | 25-34<br>35-44<br>45-54<br>55-64<br>65-74<br>75+  | Whether pain or discomfort was present (in the<br>back), and if so, if it had started longer than 3<br>months ago (“chronic” pain).                                                                                                                                       | The point prevalence of “chronic” back pain rose after age<br>25 to peak in the 55-64-year-old range with a falling<br>prevalence after age 65.                                                                                                                                        |                                                                                                                          | 83               |

| Study #<br>Type of<br>outcome<br>[ref.] | Authors,<br>year            | Country, Place<br>Study                                                      | Study<br>design                                                       | Sampling frame                                                                                                                                                                                                                                                                      | Final<br>sample size<br>/ response<br>rate           | Definiti<br>on of<br>age                                 | Definition of back pain                                                                                                                                                                                                                                                                                                            | Study results                                                                                                                                                                                                                                                 | Trend                                                                                                                                                                                        | Quality<br>score |
|-----------------------------------------|-----------------------------|------------------------------------------------------------------------------|-----------------------------------------------------------------------|-------------------------------------------------------------------------------------------------------------------------------------------------------------------------------------------------------------------------------------------------------------------------------------|------------------------------------------------------|----------------------------------------------------------|------------------------------------------------------------------------------------------------------------------------------------------------------------------------------------------------------------------------------------------------------------------------------------------------------------------------------------|---------------------------------------------------------------------------------------------------------------------------------------------------------------------------------------------------------------------------------------------------------------|----------------------------------------------------------------------------------------------------------------------------------------------------------------------------------------------|------------------|
| 19<br><br>G<br><br><br>[43]             | Finsen,<br>1988             | Norway                                                                       | Cross-<br>sectional,<br>postal<br>survey                              | Random sample of 517<br>individuals from the<br>census list of a semi-rural<br>municipality in an age<br>pattern conforming to<br>that of a previously<br>reported population with<br>hip fracture                                                                                  | 457 / 88.4%                                          | 50-59<br>60-69<br>70-79<br>80-89<br>≥ 90                 | “Whether they had been significantly bothered<br>by back pain at any time during the last 10<br>years.”                                                                                                                                                                                                                            | The prevalence of back pain decreased quite steeply for<br>men from 50-59 years to 90+; among women, it was quite<br>stable.                                                                                                                                  | Men:<br><br>Women:<br> | 75               |
| 20<br><br>E<br>F<br><br>[48]            | Brattberg<br>et al,<br>1989 | Sweden                                                                       | Cross-<br>sectional,<br>postal<br>survey                              | 1,009 randomly selected<br>individuals, aged 18-84<br>years, in a county of<br>Sweden                                                                                                                                                                                               | 827 / 93%                                            | 18-44<br>45-64<br>65-84                                  | “Do you have/have you had any pain or<br>discomfort in (the neck, upper back, lower<br>back)” for > 6 months. Those who said their<br>pain was ‘like being stiff after exercise’ or<br>worse and who reported pain which troubled<br>and affected them to ‘quite a high degree’ or<br>more were considered to have “obvious pain”. | The prevalence of obvious back pain that lasted for more<br>than 6 months increased from the age group 18-44 to the<br>45-64 group and then decreased for both men and women.                                                                                 |                                                                                                           | 75               |
| 24<br><br>D<br><br>[30]                 | Mason,<br>1994              | United Kingdom<br>(1993 OPCS<br>Omnibus<br>Survey- March,<br>April and June) | Cross-<br>sectional<br>monthly<br>face-to-face<br>interview<br>survey | Adults aged ≥ 16 years<br>randomly sampled from<br>the Postcode Address<br>File, stratified by region,<br>the proportion of<br>households renting from<br>the local authorities and<br>the proportion in which<br>the head of household is<br>in Socio-economic<br>Groups 1-5 or 13 | 6,106<br>(about<br>2,000 each<br>month) /<br>77%-80% | 16-24<br>25-34<br>35-44<br>45-54<br>55-64<br>65+         | “During the past 12 months, that is, since...,<br>have you had any back pain which lasted for<br>more than one day?” Excluding back pain due<br>to menstrual periods or feverish illness.                                                                                                                                          | The proportion of low back pain tended to increase with<br>increasing age, up to the ‘65 and over’ age group.<br>However, the proportion fell to 38% in the oldest age<br>group.<br>Low back pain with activity restriction increased with<br>increasing age. | <br>               | 83               |
| 26<br><br>D<br>E<br><br>[39]            | Lau et al,<br>1995          | China, Hong<br>Kong                                                          | Cross-<br>sectional<br>interview<br>survey                            | Adult residents of two<br>housing blocks in Shatin,<br>a new town in Hong<br>Kong                                                                                                                                                                                                   | 652 / 80%                                            | < 20<br>20-29<br>30-39<br>40-49<br>50-59<br>60-69<br>70+ | “Subjects were asked whether they had ever had<br>back pain lasting for more than a day in an area<br>(illustrated with a diagram) between the lower<br>costal margins and the gluteal folds, and<br>whether they had had such pain within the past<br>12 months.”                                                                 | There were no clear patterns in relation to age.                                                                                                                                                                                                              |                                                                                                         | 75               |

| Study #<br>Type of<br>outcome<br>[ref.] | Authors,<br>year       | Country, Place<br>Study              | Study<br>design                                  | Sampling frame                                                                                                                                  | Final<br>sample size<br>/ response<br>rate                                                                              | Definiti<br>on of<br>age                | Definition of back pain                                                                                                                                                                                                                                                                                                                                                                                                                                                                     | Study results                                                                                                                                                                                                                                                           | Trend                                                                                                                                                                                                                                                                                                                              | Quality<br>score |
|-----------------------------------------|------------------------|--------------------------------------|--------------------------------------------------|-------------------------------------------------------------------------------------------------------------------------------------------------|-------------------------------------------------------------------------------------------------------------------------|-----------------------------------------|---------------------------------------------------------------------------------------------------------------------------------------------------------------------------------------------------------------------------------------------------------------------------------------------------------------------------------------------------------------------------------------------------------------------------------------------------------------------------------------------|-------------------------------------------------------------------------------------------------------------------------------------------------------------------------------------------------------------------------------------------------------------------------|------------------------------------------------------------------------------------------------------------------------------------------------------------------------------------------------------------------------------------------------------------------------------------------------------------------------------------|------------------|
| 28<br>B<br><br>[44]                     | Hagen et al, 1997      | Norway, Oslo and Norland counties    | Cross-sectional postal survey                    | 20,000 randomly selected individuals aged 20-79 years in two counties in Norway                                                                 | 11,780 / 58.9%                                                                                                          | 20-34<br>35-49<br>50-64<br>65-79        | “Presence of pain (in back/lower limbs, neck/shoulders or both) during the previous month.”                                                                                                                                                                                                                                                                                                                                                                                                 | The prevalence of neck/shoulder pain decreased with increasing age.<br>There was no pattern for low back/lower limbs pain.<br>The prevalence of combined neck/shoulders and back/lower limbs pain increased up to the 50-64 year-old category and decreased thereafter. | Neck/shoulders:<br><br><br>Low back/lower limbs:<br><br><br>Combined:<br> | 75               |
| 29<br>D<br><br>[49]                     | Jacobsson et al, 1989  | Sweden, Malmö                        | Cross-sectional examination survey               | Random samples of 450 women and 450 men aged 50-70 years and living in the Malmö area, invited to participate in a second health survey in 1985 | 696 / 77% answered a questionnaire – 552 / 61% were examined – 445 / 49.4% accepted to participate to the second survey | 50-54<br>55-59<br>60-64<br>65-69        | “Whether pain or stiffness (in back or neck) had been present, continuously or intermittently, for more than 6 weeks during the preceding 12 months. Low back pain, with or without sciatica, was considered present when pain was localized to the lumbar region as described by Anderson (1977). Neck pain, with or without cervical brachialgia, was diagnosed when pain was located within the triangle between the occipital process, the medial corner of scapula, and the acromion.” | The prevalence of back and neck pain increased up to about 60 years and then declined slightly with increasing age.                                                                                                                                                     |                                                                                                                                                                                                                                               | 83               |
| 30<br>C<br>E<br><br>[50]                | Von Korff et al, 1988* | United States, Seattle               | Cross-sectional postal and telephone survey      | Stratified random sample of 1,500 enrollees of Group Health Cooperative of Puget Sound, aged 18-75 years, residing in the greater Seattle area  | 1,016 / 80.3%                                                                                                           | 18-24<br>25-44<br>45-64<br>65+          | Persons were asked if they ever had a back pain problem that had lasted a whole day or more or that had occurred several times in a year (excluding fleeting or minor pains). They were also asked if the pain was present in the past 6 months.                                                                                                                                                                                                                                            | Back pain prevalence showed no relationship to age.                                                                                                                                                                                                                     |                                                                                                                                                                                                                                               | 75               |
| 31<br>B<br>E<br>F<br>[41]               | Mäkelä et al, 1991     | Finland (Mini-Finland Health Survey) | Cross-sectional interview and examination survey | Two-stage cluster sample of 8,000 inhabitants of Finland aged $\geq 30$ years or more, drawn from the population registers                      | 7,217 / 90.2%                                                                                                           | 30-44<br>45-54<br>55-64<br>65-74<br>75+ | Lifetime and one-month period prevalence of “chronic” neck pain (duration $\geq 3$ months) on examination.                                                                                                                                                                                                                                                                                                                                                                                  | The prevalence of “chronic” neck pain increased with age up to the age of 55 to 64 years, and decreased thereafter.                                                                                                                                                     |                                                                                                                                                                                                                                               | 75               |

| Study #<br>Type of<br>outcome<br>[ref.] | Authors,<br>year                     | Country, Place<br>Study                                                | Study<br>design                                                           | Sampling frame                                                                                                                  | Final<br>sample size<br>/ response<br>rate | Definiti<br>on of<br>age                  | Definition of back pain                                                                                                                                                                                                                                                                       | Study results                                                                                                                                                                                                                                                                                                             | Trend                                                                                                                                                                                                                          | Quality<br>score |
|-----------------------------------------|--------------------------------------|------------------------------------------------------------------------|---------------------------------------------------------------------------|---------------------------------------------------------------------------------------------------------------------------------|--------------------------------------------|-------------------------------------------|-----------------------------------------------------------------------------------------------------------------------------------------------------------------------------------------------------------------------------------------------------------------------------------------------|---------------------------------------------------------------------------------------------------------------------------------------------------------------------------------------------------------------------------------------------------------------------------------------------------------------------------|--------------------------------------------------------------------------------------------------------------------------------------------------------------------------------------------------------------------------------|------------------|
| 33<br><br>A<br>D<br><br>[42]            | Kohlman<br>n et al,<br>1995          | Germany,<br>Lübeck                                                     | Cross-<br>sectional<br>postal<br>survey                                   | Systematic random<br>sample of city inhabitants<br>officially registered and<br>of German nationality                           | 3,109 / 81%                                | 25-34<br>35-44<br>45-54<br>55-64<br>65-74 | Questions whether respondent had back pain on<br>the day answering the survey (“today”), about<br>pain intensity on a scale from 1 to 10, about<br>back pain in the last 12 months in the time<br>before, on treatment for back pain during the<br>last 12 months and on functional capacity. | Crude figures for point prevalence of general back pain in<br>men and women increased from age 25 to the 5 <sup>th</sup> decade<br>and decreased to age 65 to 74.<br>The prevalence of heavy (grade 3) back pain increased<br>monotonously with increasing age.                                                           | General<br>back pain:<br><br><br>Heavy back<br>pain:<br> | 75               |
| 34<br><br>A<br>E<br>[37]                | Skovron<br>et al,<br>1994            | Belgium                                                                | Cross-<br>sectional<br>interview<br>survey                                | Probability sample of<br>Belgians aged ≥ 15 years,<br>stratified on gender, age,<br>social class, and habitat                   | 3,829 / 86%                                | 15-19<br>20-34<br>35-49<br>50-64<br>65+   | a) Ever had low back pain<br>b) Daily low back pain                                                                                                                                                                                                                                           | Prevalence of a) increased from 15-19 years to 65+ years.<br>In multivariate analyses, the odds ratios increased until 64<br>years and then decreased.<br>Prevalence of b) increased from age 15-19 years to age<br>≥ 65 years. In multivariate analyses, the odds ratios<br>increased until 64 years and then decreased. |                                                                                                                                             | 75               |
| 43<br><br>D<br><br>[47]                 | Santos-<br>Eggiman<br>et al,<br>2000 | Switzerland<br>(MONICA<br>Project)                                     | Cross-<br>sectional<br>questionnair<br>e survey                           | Probabilistic, two-stage,<br>sampling of non-<br>institutionalised residents<br>of three cantons (Vaud,<br>Fribourg and Ticino) | 3,227 / 62%                                | 25-34<br>35-44<br>45-54<br>55-64<br>65-74 | One-year period prevalence of ache, pain, or<br>discomfort located in the lower back (indicated<br>by a shaded area on a diagram) with or without<br>sciatica, categorised according to its duration: 1)<br>any duration, 2) > 7 days, 3) > 30 days (Nordic<br>Questionnaire).                | Age was not associated with low back pain. However, the<br>prevalence of low back pain for > 7 days and > 30 days<br>increased with increasing age in both genders.                                                                                                                                                       | Combined :<br><br><br>LBP > 7 days:<br>              | 92               |
| 45<br><br>G<br><br>[29]                 | Kellgren<br>et al,<br>1953           | United<br>Kingdom,<br>Leigh, South<br>Lancashire                       | Cross-<br>sectional<br>interview<br>and<br>examination<br>survey          | Multistage random<br>sample of individuals<br>aged ≥ 15 years                                                                   | 3,515 / 98%                                | 15-29<br>30-49<br>50+                     | Disc disorders in the past 5 years.                                                                                                                                                                                                                                                           | The maximum incidence of disc disorders was found in the<br>5 <sup>th</sup> decade.                                                                                                                                                                                                                                       |                                                                                                                                           | 83               |
| 47<br><br>B<br><br>[40]                 | Hartvigs<br>en et al,<br>2004        | Denmark<br>(Longitudinal<br>Study of Aging<br>Danish Twins -<br>LSADT) | Population-<br>based<br>prospective<br>cohort study<br>of Danish<br>twins | All Danish twins born<br>since 1870, aged ≥ 70<br>years and more,<br>interviewed in 1995,<br>1997, 1999 and 2001                | 4,484 /<br>80.4%                           | 70-74<br>75-79<br>80-84<br>85+            | “Back pain, acute low back pain or lumbago”<br>during the past month. “Pain or stiffness in the<br>neck or shoulders” during the past month.                                                                                                                                                  | No significant differences or consistently increasing or<br>decreasing trends were found between the 5-year age<br>groups for any of the outcome in cross-sectional nor<br>longitudinal analyses.                                                                                                                         |                                                                                                                                           | 75               |

\* Possible conflict; article was graded by an independent reviewer (HB).

A: Point prevalence B: One-month period prevalence C: 6-month period prevalence D: One-year period prevalence E: Lifetime prevalence F: “Chronic” back pain G: Other frequency measure

M: Benign or mixed problems S: Severe problems

References of articles assessed but not included in the review: [7, 26, 53, 56, 58, 59, 64-86]. Notice that scientific quality of articles was assessed strictly with regards to the question under study, which was rarely among the specific objectives of individual studies.
