# Supplementary material for: Does back pain prevalence really decrease with increasing age? A systematic review
Source: Oxford University Press journal article supplement (doi:10.1093/ageing/afj055), 2006-03-17
Supplement: afj055_Supplementary_Data.zip [file afj055_Supplementary_Data.zip]

**COMPLETE LIST OF REFERENCES**

1. Rapoport J, Jacobs P, Bell NR, Klarenbach S. Refining the measurement of the economic burden of chronic diseases in Canada. *Chronic Dis Can* 2004;25(1):13-21.
2. Norlund AI, Waddell G. Cost of back pain in some OECD countries. In: AL Nachemson , E Jonsson, editors. Neck and back pain: the scientific evidences of causes, diagnosis, and treatment. Philadelphia: Lippincott, Williams & Wilkins; 2000. p. 421-425.
3. Walker BF. The prevalence of low back pain: A systematic review of the literature from 1966 to 1998. *J Spinal Dis* 2000;13(3):205-217.
4. Leboeuf-Yde C, Lauritsen JM. The Prevalence of low-back pain in the literature - a structured review of 26 nordic studies from 1954 to 1993. *Spine* 1995;20(19):2112-2118.
5. Bressler HB, Keyes WJ, Rochon PA, Badley E. The prevalence of low back pain in the elderly - A systematic review of the literature. *Spine* 1999;24(17):1813-1819.
6. Sternbach R. Survey of pain in the United States: The Nuprin Pain Report. *Clin J Pain* 1986;2:49-53.
7. Papageorgiou AC, Croft PR, Ferry S, Jayson MIV, Silman AJ. Estimating the prevalence of low-back pain in the general population - Evidence from the South Manchester Back Pain Survey. *Spine* 1995;20(17):1889-1894.
8. Walsh K, Cruddas M, Coggon D. Low back pain in eight areas of Britain. *J Epidemiol Community Health* 1992;46(3):227-230.
9. Waddell G. The back pain revolution. Edinburgh: Churchill Livingstone; 1998. 438 p.
10. Gibson SJ, Helme RD. Age-related differences in pain perception and report. *Clin Geriatr Med* 2001;17(3):433-456, v-vi.
11. Anderson JA. Epidemiological aspects of back pain. *J Soc Occup Med* 1986;36(3):90-94.

12. Abenhaim L, Suissa S. Importance and economic burden of occupational back pain: a study of 2,500 cases representative of Quebec. *J Occup Med* 1987;29(8):670-674.
13. Checkoway H, Pearce N, Crawford-Brown DJ. Research methods in occupational epidemiology (2<sup>nd</sup> ed.). New York: Oxford University Press; 2004. 372 p.
14. Goel V, Iron K, Williams J. Indicators of health determinants and health status. In: V Goel JW, GM Anderson, P Blackstein-Hirsch, C Fooks, CD Naylor, editor. Patterns of Health Care in Ontario. The ICES Practice Atlas. 2nd ed. Ottawa: Canadian Medical Association; 1996. p. 5-26.
15. Altman RD. Osteoarthritis. Differentiation from rheumatoid arthritis, causes of pain, treatment. *Postgrad Med* 1990;87(3):66-72, 77-78.
16. Marino C, McDonald E. Osteoarthritis and rheumatoid arthritis in elderly patients. Differentiation and treatment. *Postgrad Med* 1991;90(5):237-243.
17. Badley E. The impact of musculoskeletal disorders on the Canadian population. *J Rheumatol* 1992;19(3):337-340.
18. Kanis JA, McCloskey EV. Epidemiology of vertebral osteoporosis. *Bone* 1992;13 Suppl 2:S1-10.
19. Martinelli TA, Wiesel SW. Epidemiology of spinal stenosis. *Instr Course Lect* 1992;41:179-181.
20. Chanchairujira K, Chung CB, Kim JY, et al. Intervertebral disk calcification of the spine in an elderly population: radiographic prevalence, location, and distribution and correlation with spinal degeneration. *Radiology* 2004;230(2):499-503.
21. Leroux I, Dionne CE, Bourbonnais R, Brisson C. Prevalence of musculoskeletal pain and associated factors in the Quebec working population. *Int Arch Occup Environ Health* 2005;78(5):379-386.

22. Liira JP, Shannon HS, Chambers LW, Haines TA. Long-term back problems and physical work exposures in the 1990 Ontario Health Survey. *Am J Public Health* 1996;86(3):382-387.
23. Statistics Canada. Population aging and the elderly. Ottawa: Statistics Canada; 1993. Report No.: 91-533E.
24. Thompson J. Aging of the population: contemporary trends and issues. *Popul Trends* 1988;21:18-22.
25. Mills C. The graying of America: Institute for philosophy and public policy; 1988.
26. Badley EM, Crotty M. An international comparison of the estimated effect of the aging of the population on the major cause of disablement, musculoskeletal disorders. *J Rheumatol* 1995;22(10):1934-1940.
27. Loney PL, Stratford PW. The prevalence of low back pain in adults: A methodological review of the literature. *Phys Ther* 1999;79(4):384-396.
28. Greenland S. Quantitative methods in the review of epidemiologic literature. *Epidemiol Rev* 1987;9:1-30.
29. Kellgren JH, Lawrence JS, Aitken-Swan J. Rheumatic complaints in an urban population. *Ann Rheum Dis* 1953;12(1):5-15.
30. Mason V. The prevalence of back pain in Great Britain: A report on OPCS omnibus survey data produced on behalf of the Department of Health. London: HMSO; 1994.
31. Elliott AM, Smith BH, Penny KI, Smith WC, Chambers WA. The epidemiology of chronic pain in the community. *Lancet* 1999;354(9186):1248-1252.
32. Thomas E, Peat G, Harris L, Wilkie R, Croft PR. The prevalence of pain and pain interference in a general population of older adults: cross-sectional findings from the North Staffordshire Osteoarthritis Project (NorStOP). *Pain* 2004;110(1-2):361-368.

- 1 33. Cassidy JD, Carroll LJ, Côté P. The Saskatchewan health and back pain survey - The  
2 prevalence of low back pain and related disability in Saskatchewan adults. *Spine*  
3 1998;23(17):1860-1866.
- 4 34. Côté P, Cassidy JD, Carroll L. The Saskatchewan Health and Back Pain Survey - The  
5 prevalence of neck pain and related disability in Saskatchewan adults. *Spine*  
6 1998;23(15):1689-1698.
- 7 35. George C. The six-month incidence of clinically significant low back pain in the  
8 Saskatchewan adult population. *Spine* 2002;27(16):1778-1782.
- 9 36. Walker BF, Muller R, Grant WD. Low back pain in Australian adults. Prevalence and  
10 associated disability. *J Manipul Physiol Ther* 2004;27(4):238-244.
- 11 37. Skovron ML, Szpalski M, Nordin M, Melot C, Cukier D. Sociocultural factors and back  
12 pain. A population-based study in Belgian adults. *Spine* 1994;19(2):129-137.
- 13 38. Goubert L, Crombez G, De Bourdeaudhuij I. Low back pain, disability and back pain myths  
14 in a community sample: prevalence and interrelationships. *Eur J Pain* 2004;8(4):385-394.
- 15 39. Lau EMC, Egger P, Coggon D, Cooper C, Valenti L, Oconnell D. Low-back pain in Hong-  
16 Kong - Prevalence and characteristics compared with Britain. *J Epidemiol Community*  
17 *Health* 1995;49(5):492-494.
- 18 40. Hartvigsen J, Christensen K, Frederiksen H. Back and neck pain exhibit many common  
19 features in old age: a population-based study of 4,486 Danish twins 70-102 years of age.  
20 *Spine* 2004;29(5):576-580.
- 21 41. Mäkelä M, Heliövaara M, Sievers K, Impivaara O, Knekt P, Aromaa A. Prevalence,  
22 determinants, and consequences of chronic neck pain in Finland. *Am J Epidemiol*  
23 1991;134(11):1356-1367.

- 1    42.    Kohlmann T, Deck R, Raspe H. Prevalence and severity of back pain in Lubeck. Aktuelle  
2           Rheumatologie 1995;20(3):99-104.
- 3    43.    Finsen V. Osteoporosis and back pain among the elderly. Acta Med Scand  
4           1988;223(5):443-449.
- 5    44.    Hagen KB, Kvien TK, Bjorndal A. Musculoskeletal pain and quality of life in patients with  
6           noninflammatory joint pain compared to rheumatoid arthritis: a population survey. J  
7           Rheumatol 1997;24(9):1703-1709.
- 8    45.    Bassols A, Bosch F, Campillo M, Canellas M, Banos JE. An epidemiological comparison of  
9           pain complaints in the general population of Catalonia (Spain). Pain 1999;83(1):9-16.
- 10   46.    Bassols A, Bosch F, Campillo M, Banos JE. [Back pain in the general population of  
11           Catalonia (Spain). Prevalence, characteristics and therapeutic behavior]. Gac Sanit  
12           2003;17(2):97-107.
- 13   47.    Santos-Eggimann B, Wietlisbach V, Rickenbach M, Paccaud F, Gutzwiller F. One-year  
14           prevalence of low back pain in two Swiss regions - Estimates from the population  
15           participating in the 1992-1993 MONICA project. Spine 2000;25(19):2473-2479.
- 16   48.    Brattberg G, Thorslund M, Wikman A. The prevalence of pain in a general population. The  
17           results of a postal survey in a county of Sweden. Pain 1989;37(2):215-222.
- 18   49.    Jacobsson L, Lindgarde F, Manthorpe R. The commonest rheumatic complaints of over six  
19           weeks' duration in a twelve-month period in a defined Swedish population. Prevalences and  
20           relationships. Scand J Rheumatol 1989;18(6):353-360.
- 21   50.    Von Korff M, Dworkin SF, Le Resche L, Kruger A. An epidemiologic comparison of pain  
22           complaints. Pain 1988;32(2):173-183.
- 23   51.    Picavet HS, Hazes JM. Prevalence of self reported musculoskeletal diseases is high. Ann  
24           Rheum Dis 2003;62(7):644-650.

- 1    52.    Picavet HS, Schouten JS. Musculoskeletal pain in the Netherlands: prevalences,  
2            consequences and risk groups, the DMC(3)-study. *Pain* 2003;102(1-2):167-178.
- 3    53.    Mobily P, Herr K, Clark M, Wallace R. An epidemiologic analysis of pain in the elderly:  
4            the Iowa 65+ Rural Health Study. *J Aging Health* 1994;6:139-154.
- 5    54.    Woo J, Ho SC, Lau J, Leung PC. Musculoskeletal complaints and associated consequences  
6            in elderly Chinese aged 70 years and over. *J Rheumatol* 1994;21(10):1927-1931.
- 7    55.    Tucker MA, Andrew MF, Ogle SJ, Davison JG. Age-associated change in pain threshold  
8            measured by transcutaneous neuronal electrical stimulation. *Age Ageing* 1989;18(4):241-  
9            246.
- 10   56.    Deyo RA, Tsui-Wu YJ. Descriptive epidemiology of low-back pain and its related medical  
11            care in the United States. *Spine* 1987;12(3):264-268.
- 12   57.    Schochat T, Jackel WH. The prevalence of back pain in the general population [German].  
13            *Die Rehabilitation*;37(4):216-223.
- 14   58.    Lavsky-Shulan M, Wallace RB, Kohout FJ, Lemke JH, Morris MC, Smith IM. Prevalence  
15            and functional correlates of low-back pain in the elderly - the Iowa 65+ Rural Health Study.  
16            *J Am Ger Soc* 1985;33(1):23-28.
- 17   59.    Tibblin G, Bengtsson C, Furunes B, Lapidus L. Symptoms by age and sex. The population  
18            studies of men and women in Gothenburg, Sweden. *Scand J Prim Health Care* 1990;8(1):9-  
19            17.
- 20   60.    Fox PL, Raina P, Jadad AR. Prevalence and treatment of pain in older adults in nursing  
21            homes and other long-term care institutions: a systematic review. *Cmaj* 1999;160(3):329-  
22            333.
- 23   61.    Reyes-Gibby CC, Aday L, Cleeland C. Impact of pain on self-rated health in the  
24            community-dwelling older adults. *Pain* 2002;95(1-2):75-82.

62. Schochat T, Jackel WH. [Prevalence of low back pain in the population]. *Rehabilitation (Stuttg)* 1998;37(4):216-223.
63. Von Korff M, Ormel J, Keefe FJ, Dworkin SF. Grading the severity of chronic pain. *Pain* 1992;50(2):133-149.
64. Bovim G, Schrader H, Sand T. Neck pain in the general population. *Spine* 1994;19(12):1307-1309.
65. Brattberg G, Parker MG, Thorslund M. The prevalence of pain among the oldest old in Sweden. *Pain* 1996;67(1):29-34.
66. Carey TS, Evans AT, Hadler NM, et al. Acute severe low back pain - A population-based study of prevalence and care-seeking. *Spine* 1996;21(3):339-344.
67. Cunningham LS, Kelsey JL. Epidemiology of musculoskeletal impairments and associated disability. *Am J Public Health* 1984;74(6):574-579.
68. Fukuhara S, Takahashi N, Konno S, Morita S, Suzukamo Y, Kikuchi S. The prevalence and burden of low back pain in Japan: A population-based survey. *J Gen Int Med* 2003;18:146-146.
69. Heliövaara M, Sievers K, Impivaara O, et al. Descriptive epidemiology and public health aspects of low back pain. *Ann Med* 1989;21(5):327-333.
70. Klaukka T, Sievers K, Takala J. Epidemiology of rheumatic diseases in Finland in 1964-76. *Scand J Rheumatol Suppl* 1982;47:5-13.
71. Laslett M, Crothers C, Beattie P, Cregten L, Moses A. The frequency and incidence of low-back pain sciatica in an urban population. *NZ Med J* 1991;104(921):424-426.
72. Reisbord LS, Greenland S. Factors associated with self-reported back pain prevalence - a population-based study. *J Chron Dis* 1985;38(8):691-702.

- 1    73.    Shulan M, Wallace R, Kohout F, Lemke J, Morris M. Prevalence and functional correlates  
2        of low-back pain in the elderly - the national-institute-on-aging established populations for  
3        epidemiologic-study of the elderly. *Am J Epidemiol* 1984;120(3):471-471.
- 4    74.    Urwin M, Symmons D, Allison T, et al. Estimating the burden of musculoskeletal disorders  
5        in the community: the comparative prevalence of symptoms at different anatomical sites,  
6        and the relation to social deprivation. *Ann Rheum Dis* 1998;57(11):649-655.
- 7    75.    Webb R, Brammah T, Lunt M, Urwin M, Allison T, Symmons D. Prevalence and predictors  
8        of intense, chronic, and disabling neck and back pain in the UK general population. *Spine*  
9        2003;28(11):1195-1202.
- 10   76.    Guez M, Hildingsson C, Nilsson M, Toolanen G. The prevalence of neck pain: A  
11        population-based study from northern Sweden. *Acta Orthop Scand* 2002;73(4):455-459.
- 12   77.    Bowsher D, Rigge M, Sopp L. Prevalence of chronic pain in the British population: a  
13        telephone survey of 1037 households. *Pain Clinic* 1991;4:223-230.
- 14   78.    Hirsch C, Jonsson B, Lewin T. Low-back symptoms in a Swedish female population. *Clin*  
15        *Orthop* 1969;63:171-176.
- 16   79.    Feller BA. [Prevalence of selected impairments: United States-1977.]. *Vital Health Stat* 10  
17        1981;10(134):1-70.
- 18   80.    Collins J. Prevalence of selected chronic conditions. United States. 1979-1981. National  
19        Center for Health Statistics. *Vital Health Stat* 10 1986;155.
- 20   81.    Laine VA. Rheumatic complaints in an urban population in Finland. *Acta Rheumatol Scand*  
21        1962;8:81-88.
- 22   82.    Bonham GS. Prevalence of chronic skin and musculoskeletal conditions. United States-  
23        1976. *Vital Health Stat* 10 1978(124):i-iv, 1-57.



83. Badley EM, Tennant A. Impact of disablement due to rheumatic disorders in a British population: estimates of severity and prevalence from the Calderdale Rheumatic Disablement Survey. *Ann Rheum Dis* 1993;52(1):6-13.
84. Bjelle A, Allander E, Magi M. Rheumatic disorders in the Swedish population and health care system. *J Rheumatol* 1980;7(6):877-885.
85. Raspe H, Heiner K, Kohlmann T. Ruckenschmerzen -eine Epidemie unserer Tage? *Deutsches Arzteblatt* 90 Heft 1993;44(5):B2165-B2169.
86. Reynolds DL, Chambers LW, Badley EM, et al. Physical disability among Canadians reporting musculoskeletal diseases. *J Rheumatol* 1992;19(7):1020-1030.
